# Supplementary material for: Optoelectronic synapses based on a triple cation perovskite and Al/MoO3 interface for neuromorphic information processing
Source: Royal Society of Chemistry journal article supplement (doi:10.1039/d3na00677h), 2023-12-06
Supplement: d3na00677h1.pdf [file d3na00677h1.pdf]

# Supporting Information

## Title

Optoelectronic Synapses Based on Triple Cation Perovskite and Al/MoO<sub>3</sub> interface for Neuromorphic Information Processing

## Authors

Haoliang Sun<sup>a, b</sup>, Haoliang Wang<sup>b</sup>, Shaohua Dong<sup>a, \*</sup>, Shijie Dai<sup>b</sup>, Xiaoguo Li<sup>b</sup>, Xin Zhang<sup>b</sup>, Liangliang Deng<sup>b</sup>, Kai Liu<sup>b</sup>, Fengcai Liu<sup>b</sup>, Hua Tan<sup>b</sup>, Kun Xue<sup>a</sup>, Chao Peng<sup>a, d</sup>, Jiao Wang<sup>b</sup>, Yi Li<sup>a, c</sup>, Anran Yu<sup>b, \*</sup>, Hongyi Zhu<sup>a, c, \*</sup>, Yiqiang Zhan<sup>b, \*</sup>

- a. Peng Cheng Laboratory, Shenzhen 518055, China
- b. Center for Micro Nano Systems, School of Information Science and Technology (SIST), Fudan University, Shanghai 200433, China
- c. Shanghai Engineering Research Center for Broadband Technologies and Applications, Shanghai 200436, China
- d. State Key Laboratory of Advanced Optical Communication Systems and Networks, Department of Electronics and Frontiers Science Center for Nano-optoelectronics, Peking University, Beijing 100080, China

\* Corresponding authors.

E-mail addresses: [lightdong@yeah.net](mailto:lightdong@yeah.net) (Shaohua Dong), [aryu@fudan.edu.cn](mailto:aryu@fudan.edu.cn) (Anran Yu), [hyzhu@bnc.org.cn](mailto:hyzhu@bnc.org.cn) (Hongyi Zhu), [yqzhan@fudan.edu.cn](mailto:yqzhan@fudan.edu.cn) (Yiqiang Zhan).

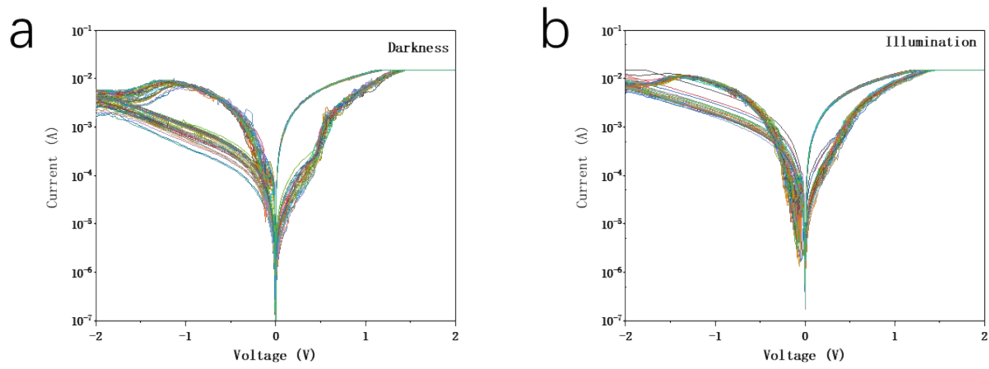

Figure S1, Resistive switching and photo response of the CsFAMA synaptic transistor. (a) I–V curves in darkness and (b) under light illumination.

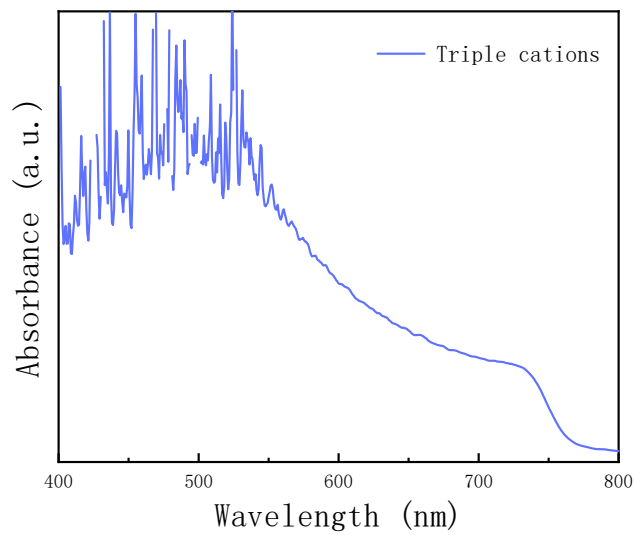

Figure S2. The absorption spectra of the CsFAMA triple cations perovskite films.

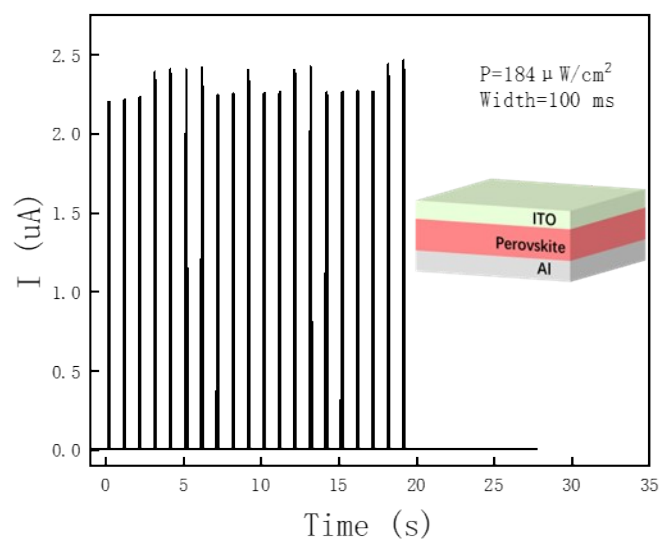

Figure S3. EPSC triggered by 20 optical pulses on the Al/CsFAMA/ITO device.
